# Supplementary material for: Ecofriendly Synthesis of Silver Nanoparticles by Terrabacter humi sp. nov. and Their Antibacterial Application against Antibiotic-Resistant Pathogens
Source: PubMed Central journal article supplement (PMC7766514; doi:10.3390/ijms21249746), 2020-12-21
Supplement: ijms-21-09746-s001.pdf [file ijms-21-09746-s001.pdf]

# Supplementary Materials

## **Ecofriendly Synthesis of Silver Nanoparticles by *Terrabacter humi* sp. nov. and Their Antibacterial Application against Antibiotic-Resistant Pathogens.**

Shahina Akter<sup>1</sup>, Sun-Young Lee<sup>2</sup>, Muhammad Zubair Siddiqi<sup>3</sup>, Sri Renukadevi Balusamy<sup>4</sup>, Ashrafudoulla<sup>5</sup>, Esrat Jahan Rupa<sup>6</sup>,  
Md. Amdadul Huq<sup>2\*</sup>

<sup>1</sup> *Department of Food Science and Biotechnology, Gachon University, Seongnam, 461-701, Republic of Korea.*

<sup>2</sup> *Department of Food and Nutrition, Chung-Ang University, Anseong, Gyeonggi-do, 17546, Republic of Korea*

<sup>3</sup> *Department of Biotechnology, Hankyong National University, Anseong, Gyeonggi-do, 17579, Republic of Korea*

<sup>4</sup> *Department of Food Science and Technology, Sejong University, Gwangjin-gu, Seoul, 143-747, Republic of Korea*

<sup>5</sup> *Department of Food Science and Technology, Chung-Ang University, Anseong-si, Gyeonggi-do 17546, Korea;*

<sup>6</sup> *Dept.of oriental medicinal material processing. Kyung Hee university, Yongin-si, Republic of Korea.*

### **\* Corresponding author:**

Md. Amdadul Huq,

Chung-Ang University, Anseong-si, Gyeonggi-do, 17546, Republic of Korea.

Tel: +82-031-670-4568

E-mail: [amdadbge@gmail.com](mailto:amdadbge@gmail.com) ; [amdadbge100@cau.ac.kr](mailto:amdadbge100@cau.ac.kr)

**Supplementary Table S1.** dDDH and ANI values between proposed novel species *Terrabacter humi* MAHUQ-38<sup>T</sup> and the close type strains of the genus *Ramlibacter*.

| Query genome                                                      | Reference genome                                                  | Formula 1 |                |          |                      | Formula 2 |                |          |                      | Formula 3 |                |          |                      | ANI (%) |
|-------------------------------------------------------------------|-------------------------------------------------------------------|-----------|----------------|----------|----------------------|-----------|----------------|----------|----------------------|-----------|----------------|----------|----------------------|---------|
|                                                                   |                                                                   | DDH       | Model C.I.     | Distance | Prob. DDH $\geq$ 70% | DDH       | Model C.I.     | Distance | Prob. DDH $\geq$ 70% | DDH       | Model C.I.     | Distance | Prob. DDH $\geq$ 70% |         |
| <i>Terrabacter soli</i> MAHUQ-38 <sup>T</sup><br>(JACVCU00000000) | <i>T. tumescens</i> JCM 1365 <sup>T</sup><br>(GCM10009721)        | 40.30     | [36.9 - 43.7%] | 0.3899   | 1.8                  | 27.20     | [24.8 - 29.7%] | 0.1590   | 0.03                 | 36.00     | [33.1 - 39.1%] | 0.4869   | 0.03                 | 83.71   |
|                                                                   | <i>T. aerolatus</i> NBRC 106305 <sup>T</sup><br>(GCA_007991735.1) | 38.70     | [35.3 - 42.2%] | 0.4055   | 1.23                 | 26.70     | [24.4 - 29.2%] | 0.1618   | 0.02                 | 34.80     | [31.8 - 37.8%] | 0.5017   | 0.02                 | 83.44   |

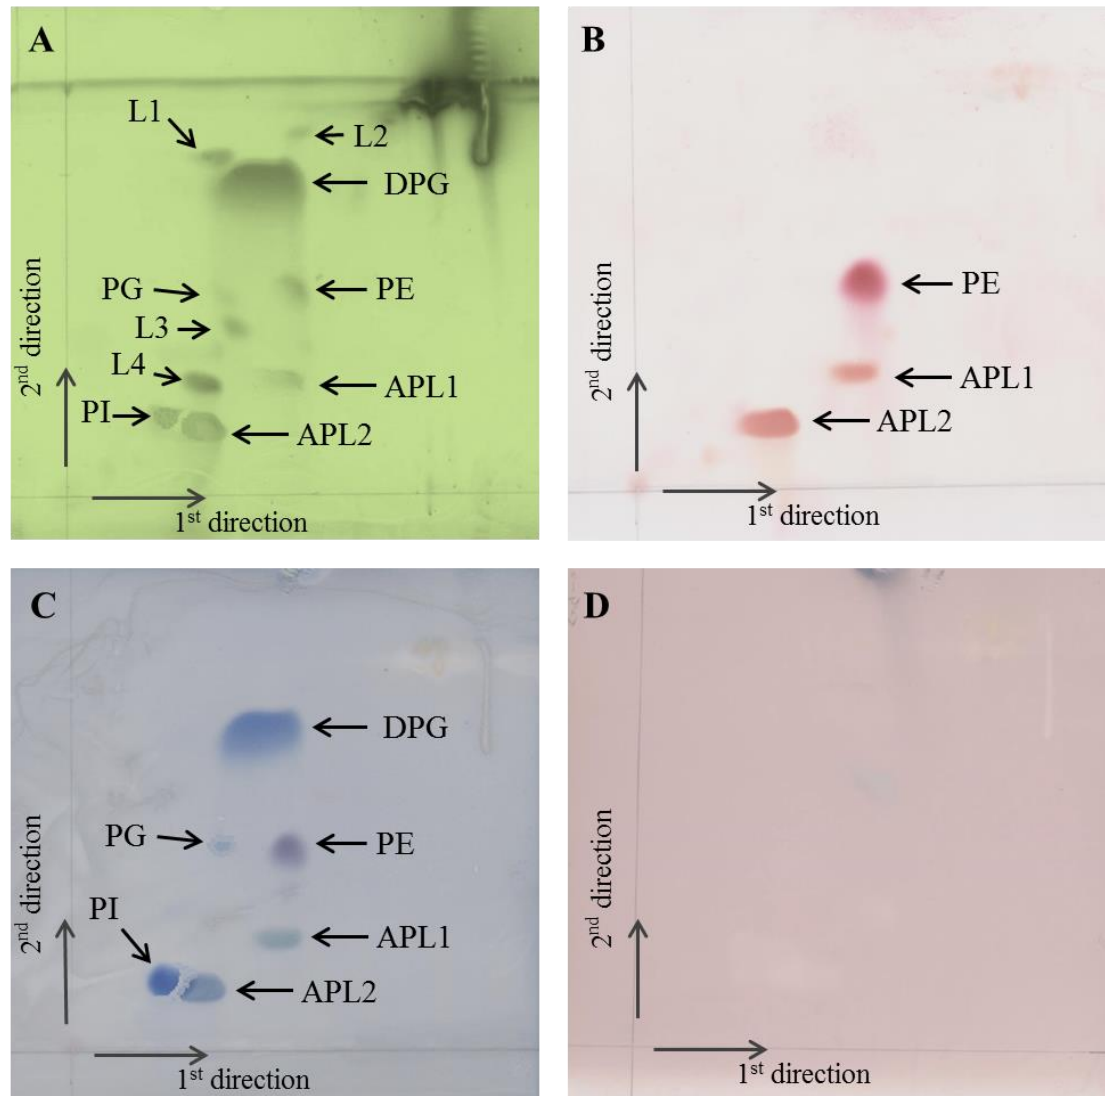

**Supplementary Figure S1.** Two-dimensional TLC of the polar lipids of *Terrabacter humi* MAHUQ-38<sup>T</sup>. (A) Total lipids detectable by spraying with 5% ethanolic molybdophosphoric acid; (B) Aminolipids detected by spraying with 0.2% (w/v) ninhydrin; (C) Phospholipids detected by spraying with molybdenum blue; and (D) Glycolipids were analysed by  $\alpha$  naphthol reagent. Abbreviations: DPG, diphosphatidylglycerol; PG, phosphatidylglycerol; PE, phosphatidylethanolamine; PI, phosphatidylinositol; APL1-2, unidentified aminophospholipids; and L1-4, unidentified polar lipids.
